# Supplementary material
Source: PubMed Central journal article supplement (PMC3084087)
Supplement: 1100300108_pnas.1100300108_SI.pdf [file 1100300108_pnas.1100300108_SI.pdf]

# Supporting Information

Zhang et al. 10.1073/pnas.1100300108

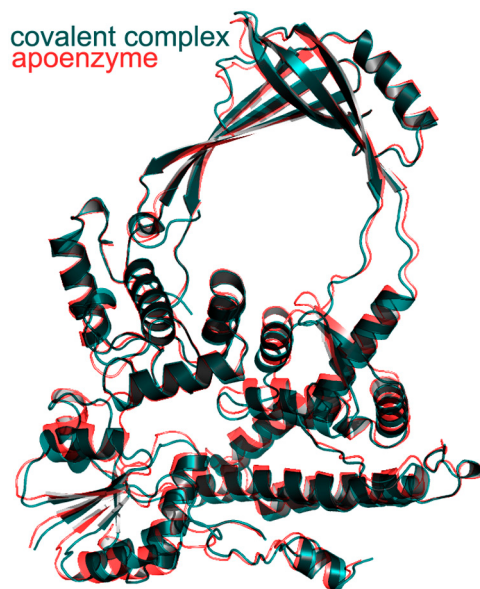

**Fig. S1.** Front view (looking into the ssDNA binding groove) of the structural alignment of topoisomerase I covalent complex and the apo enzyme. The alignment is optimized for the overlapping of domains II and III.

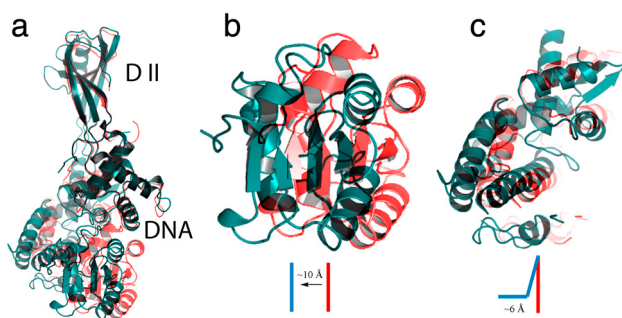

**Fig. S2.** Domain rearrangement upon the formation of the covalent complex. Domains II and III of the covalent complex and the apo enzyme were aligned with rmsd of 0.64 Å for the C $\alpha$ s. (a) Overview of the relative domain rearrangement from the side view. The apo structure is in red and the covalent complex is in blue. (b) Relative to domains II and III, domain I is shifted back about 6 to 10 Å when viewed from the side. (c) Domain IV rotates backward approximately 5° in addition to its internal rearrangement.

The diagram illustrates the RNA sequence of the Tetrahymena self-splicing intron, oriented from 5' to 3'. The sequence is shown as a series of nucleotides (A, T, C, G) with their corresponding positions relative to the active site. Key residues and modifications are highlighted in red ovals, and specific residues are labeled in blue. The sequence is as follows:

- 5' end: A -7
- A -6 (linked to R70)
- T -5 (linked to Y177 and R70)
- C -4 (linked to R173)
- G -3 (linked to E115, D36, and R169)
- C -2 (linked to E115 and H33)
- T -1 (linked to H33 and G32)
- OH group at the 3' end of the T -1 nucleotide.
- Y319 (linked to R321)
- T +1 (linked to V31)
- T +2

Residues and modifications highlighted in red ovals include: R507, R195, R493, and R321. Other residues labeled include S180, Q197, S192, V196, Q197, D172, I491, R168, E115, S495, S10, and Q309.

2 of 5

|          |     |             |             | NCBI ID   | Organism                          |
|----------|-----|-------------|-------------|-----------|-----------------------------------|
| *EcTop1  | 161 | RVNAQQARRF  | MDRVVGYMVS  | 415338    | <i>Escherichia coli</i>           |
| HiTop1   | 167 | RVNAQQTRRF  | LDREVGFVMS  | 687790    | <i>Haemophilus influenzae</i>     |
| SaTop1   | 134 | LVDAQQARRI  | LDRLVGYNIS  | 82750851  | <i>Staphylococcus aureus</i>      |
| *BcTop1  | 132 | LVDAQQARRI  | LDRLVGYNIS  | 52141655  | <i>Bacillus cereus</i>            |
| BsTop1   | 132 | LVDAQQARRI  | LDRLVGYKIS  | 520753    | <i>Bacillus subtilis</i>          |
| BaTop1   | 132 | LVDAQQARRI  | LDRLVGYNIS  | 30258481  | <i>Bacillus anthracis</i>         |
| *MlTop1  | 160 | LVDAGETRR   | LDRLFGYELS  | 289557429 | <i>Micrococcus luteus</i>         |
| *MtTop1  | 160 | LVDAGETRR   | LDRLGYEVS   | 15610782  | <i>Mycobacterium tuberculosis</i> |
| *TmTop1  | 133 | KVRAQLARRI  | LDRLVGYSL   | 881494    | <i>Thermotoga maritima</i>        |
| MgTop1   | 132 | WVESQFARQI  | LDRLMIGFRLS | 12044974  | <i>Mycoplasma genitalium</i>      |
|          |     |             |             |           |                                   |
| *TmRG    | 718 | LVKAQIVRRV  | QDRWIGFELS  | 15642947  | <i>Thermotoga maritima</i>        |
| *SbRG    | 762 | LVMSQIVRR   | EDRWIGFTLS  | 1679872   | <i>Sulfolobus shibatae</i>        |
| AfRG     | 680 | LVKAQVVRR   | EDRWIGFVLS  | 11498629  | <i>Archaeoglobus fulgidus</i>     |
| SaRG     | 808 | LVKSQVLRR   | EDRWIGFKLS  | 152943    | <i>Sulfolobus acidocaldarius</i>  |
| MkRGB    | 955 | RVSQAQLRRV  | ADRWIGFSL   | 1173903   | <i>Methanopyrus kandleri</i>      |
|          |     |             |             |           |                                   |
| *EcTop3  | 158 | LCVSALARAR  | ADWLYGINMT  | 148026    | <i>Escherichia coli</i>           |
| HiTop3   | 158 | LATSALARAR  | ADWLYGINMT  | 1174743   | <i>Haemophilus influenzae</i>     |
| *SfTop3  | 160 | MINAGIARRH  | IDWLWGINVS  | 15897795  | <i>Sulfolobus solfataricus</i>    |
| SaTop3   | 155 | LYYAALARSE  | ADWIVQINAT  | 81704216  | <i>Staphylococcus aureus</i>      |
| *BcTop3  | 156 | LYASAVARSE  | ADWYIGLNAT  | 52144873  | <i>Bacillus cereus</i>            |
| BsTop3   | 156 | LYHSAVARAE  | ADWIVGINAT  | 81345907  | <i>Bacillus subtilis</i>          |
|          |     |             |             |           |                                   |
| *ScTop3  | 175 | SVHAVGTRIE  | IDLRAGLRAG  | 173002    | <i>Sacharomyces cerevisiae</i>    |
| *HsTop3a | 200 | VSDAVDVRRQ  | LDLRIGAAFT  | 2501242   | <i>Homo sapiens</i>               |
| DmTop3a  | 192 | QSDAVDVRRQ  | LDLRTGAAIT  | 33860232  | <i>Drosophila melanogaster</i>    |
| HsTop3b  | 176 | EALSVDARRQ  | LDLRIGCAFT  | 6686033   | <i>Homo sapiens</i>               |
| *DmTop3b | 173 | EAKSVDAARRQ | LDLRIGCAFT  | 14286175  | <i>Drosophila melanogaster</i>    |

**Fig. S5.** Alignment of type IA topoisomerase sequences in region important for DNA substrate binding and recognition. The residues highlighted in red are conserved in all type IA topoisomerases. The residues highlighted in blue are conserved for topoisomerase I and reverse gyrase enzymes that cleave DNA with the specificity of C nucleotide at the  $-4$  position. \*Topoisomerases with cleavage sequence selectivity determined experimentally (1–11).

1. Tse YC, Kirkegaard K, Wang JC (1980) Covalent bonds between protein and DNA. Formation of phosphotyrosine linkage between certain DNA topoisomerases and DNA. *J Biol Chem* 255:5560–5565.
2. Annamalai T, Dani N, Cheng B, Tse-Dinh YC (2009) Analysis of DNA relaxation and cleavage activities of recombinant *Mycobacterium tuberculosis* DNA topoisomerase I from a new expression and purification protocol. *BMC Biochem* 10:18.
3. Bouthier de la Tour C, et al. (2008) Mutational analysis of the helicase-like domain of *Thermotoga maritima* reverse gyrase. *J Biol Chem* 283:27395–27402.
4. Jaxel C, Duguet M, Nadal M (1999) Analysis of DNA cleavage by reverse gyrase from *Sulfolobus shibatae* B12. *Eur J Biochem* 260:103–111.
5. Viard T, Lamour V, Duguet M, Bouthier de la Tour C (2001) Hyperthermophilic topoisomerase I from *Thermotoga maritima*. A very efficient enzyme that functions independently of zinc binding. *J Biol Chem* 276:46495–46503.
6. Goulaouic H, et al. (1999) Purification and characterization of human DNA topoisomerase III $\alpha$ . *Nucleic Acids Res* 27:2443–2450.
7. Kim RA, Wang JC (1992) Identification of the yeast TOP3 gene product as a single strand-specific DNA topoisomerase. *J Biol Chem* 267:17178–17185.
8. Li Z, Hiasa H, DiGate R (2005) *Bacillus cereus* DNA topoisomerase I and III $\alpha$ : Purification, characterization and complementation of *Escherichia coli* TopoIII activity. *Nucleic Acids Res* 33:5415–5425.
9. Wilson-Sali T, Hsieh TS (2002) Preferential cleavage of plasmid-based R-loops and D-loops by *Drosophila* topoisomerase III $\beta$ . *Proc Natl Acad Sci USA* 99:7974–7979.
10. Dai P, Wang Y, Ye R, Chen L, Huang L (2003) DNA topoisomerase III from the hyperthermophilic archaeon *Sulfolobus solfataricus* with specific DNA cleavage activity. *J Bacteriol* 185:5500–5507.
11. DiGate RJ, Mariani KJ (1988) Identification of a potent decatenating enzyme from *Escherichia coli*. *J Biol Chem* 263:13366–13373.

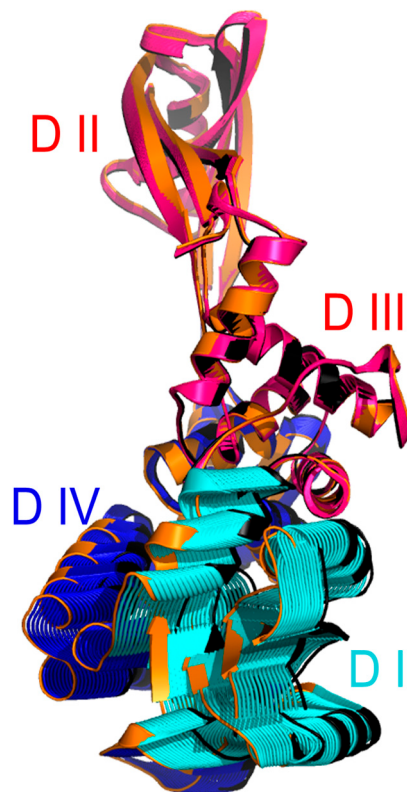

**Movie S1.** Side view (in reference to Fig. 1A) domain mobility animation of an interpolation between the topoisomerase I apo enzyme (PDB ID code 1ECL, black) and the topoisomerase I-substrate covalent complex (orange). Domains I and II are in red, domain III in cyan, and domain IV in blue. The coordinate interpolation was performed by the Database of Molecular Movements Morph Server at Yale University (1), and the movie was rendered with PyMol.

[Movie S1 \(MOV\)](#)

1. Flores S, et al. (2006) The database of macromolecular motions: New features added at the decade mark. *Nucleic Acids Res* 34:D296–301.

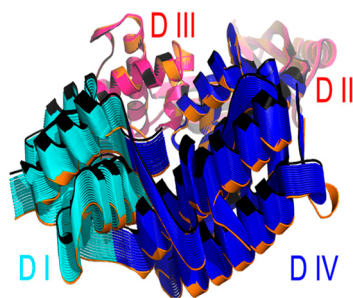

**Movie S2.** View from the bottom (in reference to Fig. 1A) domain mobility animation of an interpolation between the topoisomerase I apo enzyme (PDB ID code 1ECL, black) and the topoisomerase I-substrate covalent complex (orange). Domains I and II are in red, domain 3 in cyan, and domain IV in blue. The coordinate interpolation was performed by the Database of Molecular Movements Morph Server at Yale University (1), and the movie was rendered with PyMol.

[Movie S2 \(MOV\)](#)

1. Flores S, et al. (2006) The database of macromolecular motions: New features added at the decade mark. *Nucleic Acids Res* 34:D296–301.

| Data collection                                      | D111N mutant      | Covalent complex    |
|------------------------------------------------------|-------------------|---------------------|
| Space group                                          | $P2_12_12_1$      | $P2_12_12_1$        |
| Cell dimensions                                      |                   |                     |
| <i>a</i> , <i>b</i> , <i>c</i> (Å)                   | 63.5, 79.3, 141.0 | 61.6, 91.76, 141.98 |
| $\alpha$ , $\beta$ , $\gamma$ (°)                    | 90, 90, 90        | 90, 90, 90          |
| Resolution (Å)                                       | 1.9 (1.93–1.90)   | 2.3 (2.34–2.30)     |
| <i>R</i> <sub>sym</sub> or <i>R</i> <sub>merge</sub> | 6.4% (64%)        | 9% (76%)            |
| <i>I</i> / $\sigmaI$                                 | 39 (3)            | 33 (3)              |
| Completeness (%)                                     | 99.8 (100)        | 99.6(100)           |
| Redundancy                                           | 9.7 (9.8)         | 4.9 (5.1)           |
| Refinement                                           |                   |                     |
| Resolution (Å)                                       | 500–1.9           | 500–2.3             |
| No. reflections                                      | 56,450            | 58,558              |
| <i>R</i> <sub>work</sub> / <i>R</i> <sub>free</sub>  | 21.7%/24.9%       | 23.0%/26.9%         |
| No. atoms                                            |                   |                     |
| Protein                                              | 4,483             | 4,408               |
| DNA ion                                              | 15                | 1,763               |
| Water                                                | 421               | 140                 |
| <i>B</i> factors                                     |                   |                     |
| Protein                                              | 39.5              | 50.2                |
| DNA                                                  |                   | 59.0                |
| Water Hg                                             | 44.2              | 41.846.1            |
| rms deviations                                       |                   |                     |
| Bond lengths (Å)                                     | 0.007             | 0.007               |
| Bond angles (°)                                      | 1.2               | 1.7                 |
